# Supplementary material
Source: MDPI journal article supplement (https://www.mdpi.com/2227-9717/11/4/1009)
Supplement: s1 [file s1]

# **Optimization of binary adsorption of metronidazole and sulfamethoxazole in aqueous solution enhanced with DFT calculations.**

**Juan Carlos Serna-Carrizales <sup>1</sup>, Ana I. Zárate-Guzmán <sup>1,\*</sup>, Angélica Aguilar-Aguilar <sup>1</sup>, Angélica Forgionny <sup>2</sup>, Esther Bailón-García<sup>3</sup>, Elizabeth Florez -Yepes<sup>2</sup>, Raúl Ocampo-Pérez<sup>1</sup>**

**\*Correponding author: [aizg\\_08@hotmail.com](mailto:aizg_08@hotmail.com)**

**Supplementary Material**

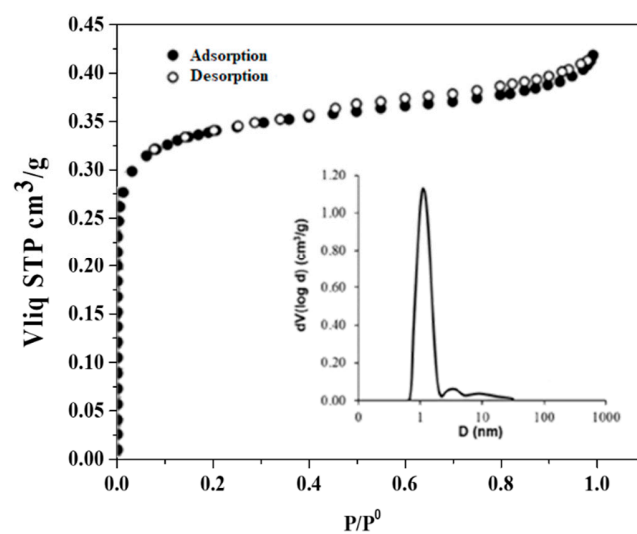

**Figure S1.-** Adsorption-desorption isotherm of N<sub>2</sub> at 77 K using CAG

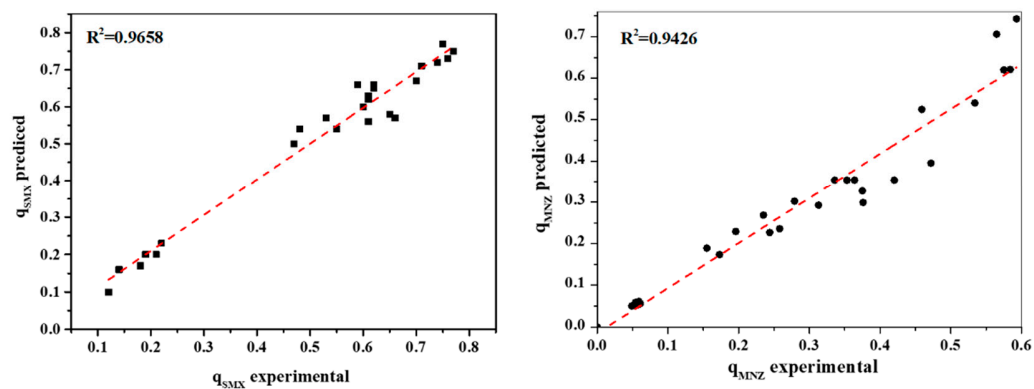

**Figure S2.-** Correlation between experimental values and predicted values in adsorption process for a) SMX, b) MNZ.

**Table S1.-** CAG textural properties (Serna-Carrizales et al., 2021)

| Sample | $S_{\text{BET}}$           | $W_0(\text{N}_2)$           | $W_0(\text{CO}_2)$          | $L_0(\text{N}_2)$ | $L_0(\text{CO}_2)$ | $V_{0.95}$                  | $V_{\text{meso}}$           |
|--------|----------------------------|-----------------------------|-----------------------------|-------------------|--------------------|-----------------------------|-----------------------------|
|        | $\text{m}^2 \text{g}^{-1}$ | $\text{cm}^3 \text{g}^{-1}$ | $\text{cm}^3 \text{g}^{-1}$ | nm                | nm                 | $\text{cm}^3 \text{g}^{-1}$ | $\text{cm}^3 \text{g}^{-1}$ |
| F400   | 756                        | 0.317                       | 0.244                       | 1.27              | 0.64               | 0.360                       | 0.066                       |

**$S_{\text{BET}}$ :** Specific area obtained by the adsorption isotherm of  $\text{N}_2$  at 77 K.

**$W_0(\text{N}_2)$ :** Micropore volumes obtained by  $\text{N}_2$  adsorption.

**$W_0(\text{CO}_2)$ :** Micropore volumes determined by  $\text{CO}_2$  adsorption.

**$L_0(\text{N}_2)$  and  $L_0(\text{CO}_2)$ :** Size of micropores determined by the Dubinin-Radushkevich equation.

**$V_{0.95}$ :** Pore volume determined by Gurvich's law at a relative pressure of 0.95.

**$V_{\text{meso}}$ :** Volume of mesopores calculated as Gurvich Volume

**Table S2.** Design of experiments for the binary adsorption process

| Exp. No. | pH | Temperature °C | [MNZ] mmol L <sup>-1</sup> | [SMX] mmol L <sup>-1</sup> | q <sub>MNZ</sub> mmol g <sup>-1</sup> | q <sub>SMX</sub> mmol g <sup>-1</sup> | q <sub>T</sub> mmol g <sup>-1</sup> |
|----------|----|----------------|----------------------------|----------------------------|---------------------------------------|---------------------------------------|-------------------------------------|
| 1        | 10 | 10             | 0.16                       | 0.16                       | 0.376                                 | 0.371                                 | 0.747                               |
| 2        | 2  | 25             | 0.02                       | 0.16                       | 0.058                                 | 0.418                                 | 0.476                               |
| 3        | 2  | 25             | 0.30                       | 0.16                       | 0.313                                 | 0.373                                 | 0.686                               |
| 4        | 10 | 25             | 0.02                       | 0.16                       | 0.051                                 | 0.378                                 | 0.429                               |
| 5        | 5  | 40             | 0.30                       | 0.16                       | 0.534                                 | 0.497                                 | 1.032                               |
| 6        | 5  | 25             | 0.16                       | 0.16                       | 0.420                                 | 0.430                                 | 0.850                               |
| 7        | 2  | 25             | 0.16                       | 0.02                       | 0.353                                 | 0.040                                 | 0.393                               |
| 8        | 5  | 10             | 0.30                       | 0.16                       | 0.565                                 | 0.370                                 | 0.935                               |
| 9        | 10 | 25             | 0.16                       | 0.30                       | 0.065                                 | 0.043                                 | 0.107                               |
| 10       | 5  | 10             | 0.16                       | 0.02                       | 0.472                                 | 0.046                                 | 0.518                               |
| 11       | 5  | 25             | 0.02                       | 0.30                       | 0.049                                 | 0.502                                 | 0.551                               |
| 12       | 2  | 25             | 0.16                       | 0.30                       | 0.163                                 | 0.487                                 | 0.650                               |
| 13       | 5  | 25             | 0.30                       | 0.30                       | 0.584                                 | 0.550                                 | 1.134                               |
| 14       | 5  | 40             | 0.16                       | 0.30                       | 0.244                                 | 0.596                                 | 0.840                               |
| 15       | 5  | 10             | 0.02                       | 0.16                       | 0.059                                 | 0.343                                 | 0.403                               |
| 16       | 5  | 25             | 0.30                       | 0.02                       | 0.575                                 | 0.033                                 | 0.608                               |
| 17       | 2  | 10             | 0.16                       | 0.16                       | 0.279                                 | 0.356                                 | 0.635                               |
| 18       | 10 | 25             | 0.30                       | 0.16                       | 0.593                                 | 0.218                                 | 0.811                               |
| 19       | 10 | 40             | 0.16                       | 0.16                       | 0.364                                 | 0.308                                 | 0.672                               |
| 20       | 5  | 40             | 0.21                       | 0.02                       | 0.460                                 | 0.049                                 | 0.509                               |
| 21       | 2  | 40             | 0.16                       | 0.16                       | 0.156                                 | 0.390                                 | 0.546                               |
| 22       | 5  | 25             | 0.16                       | 0.16                       | 0.353                                 | 0.278                                 | 0.631                               |
| 23       | 5  | 40             | 0.02                       | 0.16                       | 0.061                                 | 0.380                                 | 0.441                               |
| 24       | 5  | 25             | 0.02                       | 0.02                       | 0.054                                 | 0.035                                 | 0.089                               |
| 25       | 5  | 10             | 0.16                       | 0.30                       | 0.235                                 | 0.584                                 | 0.819                               |
| 26       | 5  | 25             | 0.16                       | 0.16                       | 0.336                                 | 0.278                                 | 0.614                               |
| 27       | 10 | 25             | 0.16                       | 0.02                       | 0.374                                 | 0.020                                 | 0.394                               |

**Table S3.-** Values of the parameters of the Langmuir, Freundlich and Prausnitz-Radke adsorption isotherm models in the individual adsorption process of SMX and MNZ on GAC at 25°C and pH 7.

| <i>Molécula</i> | <i>pH</i> | <i>Langmuir</i>      |                      |       |     | <i>Freundlich</i>                        |       |       |      | <i>Prausnitz-Radke</i> |                                                                     |         |       |     |
|-----------------|-----------|----------------------|----------------------|-------|-----|------------------------------------------|-------|-------|------|------------------------|---------------------------------------------------------------------|---------|-------|-----|
|                 |           | $q_m$                | K                    | $R^2$ | %   | K                                        | n     | $R^2$ | %D   | a                      | B                                                                   | $\beta$ | $R^2$ | *%D |
|                 |           | mmol g <sup>-1</sup> | L mmol <sup>-1</sup> |       | D   | Mmol/ <sup>1/n</sup> L <sup>1/n</sup> /g |       |       |      | L g <sup>-1</sup>      | L <sup><math>\beta</math></sup> mmol <sup>-<math>\beta</math></sup> |         |       |     |
| <b>SMX</b>      | 7         | 1.611                | 9.062                | 0.990 | 2.9 | 1.051                                    | 6.971 | 0.939 | 7.2  | 10.333                 | 7.257                                                               | 1.303   | 0.998 | 5.0 |
| <b>MNZ</b>      | 7         | 1.103                | 9.721                | 0.984 | 9.3 | 1.632                                    | 2.884 | 0.895 | 15.3 | 51.798                 | 47.252                                                              | 0.938   | 0.984 | 6.1 |

\* Values obtained from the following equation:

$$\%D = \left( \frac{1}{N} \sum_{i=1}^N \left| \frac{q_{i, \text{exp}} - q_{i, \text{pred}}}{q_{i, \text{exp}}} \right| \right) \times 100\%$$

**Where:**

%D is the percentage deviation.

$q_{i, \text{exp}}$  is the experimental mass of pharmaceutical adsorbed at equilibrium in mmol g<sup>-1</sup>

$q_{i, \text{pred}}$  is the mass of pharmaceutical adsorbed predicted with the adsorption isotherm in mmol g<sup>-1</sup>.

N represents the number of experiments

**Table S4.** ANOVA for the Surface quadratic model of  $q_{\text{SMX}}$ 

| Source                   | Sum of squares         | df | Mean square            | F value | Prob > F |
|--------------------------|------------------------|----|------------------------|---------|----------|
| <b>Model</b>             | 1.06                   | 7  | 0.15                   | 57.55   | < 0.0001 |
| <b>pH</b>                | 0.020                  | 1  | 0.020                  | 7.48    | 0.0131   |
| <b>T</b>                 | $1.12 \times 10^{-03}$ | 1  | $1.12 \times 10^{-03}$ | 0.43    | 0.5213   |
| <b>[SMX]</b>             | 0.82                   | 1  | 0.82                   | 314.26  | < 0.0001 |
| <b>pH * [SMX]</b>        | 0.021                  | 1  | 0.021                  | 8.04    | 0.0106   |
| <b>pH<sup>2</sup></b>    | $9.15 \times 10^{-03}$ | 1  | $9.15 \times 10^{-03}$ | 3.49    | 0.0772   |
| <b>T<sup>2</sup></b>     | 0.011                  | 1  | 0.011                  | 4.27    | 0.0527   |
| <b>[SMX]<sup>2</sup></b> | 0.15                   | 1  | 0.15                   | 55.49   | < 0.0001 |
| <b>Residual</b>          | 0.050                  | 19 | $2.62 \times 10^{-03}$ |         |          |
| <b>Lack of fit</b>       | 0.039                  | 17 | $2.28 \times 10^{-03}$ | 0.41    | 0.8802   |
| <b>Pure error</b>        | 0.011                  | 2  | $5.50 \times 10^{-03}$ |         |          |
| <b>Total</b>             | 1.11                   | 26 |                        |         |          |

**Table S5.** ANOVA for the Surface quadratic model of  $q_{MNZ}$

| <b>Source</b>         | <b>Sum of Squares</b> | <b>df</b> | <b>Mean Square</b> | <b>F Value</b> | <b>p-value Prob &gt; F</b> |
|-----------------------|-----------------------|-----------|--------------------|----------------|----------------------------|
| <b>Model</b>          | 0.810                 | 5         | 0.162              | 54.026         | < 0.0001                   |
| <b>pH</b>             | 0.0430                | 1         | 0.0430             | 14.372         | 0.0011                     |
| <b>[MNZ]</b>          | 0.673                 | 1         | 0.673              | 224.688        | < 0.0001                   |
| <b>[SMX]</b>          | 0.0328                | 1         | 0.0328             | 10.947         | 0.0033                     |
| <b>pH * [MNZ]</b>     | 0.0206                | 1         | 0.0206             | 6.870          | 0.0160                     |
| <b>pH<sup>2</sup></b> | 0.0254                | 1         | 0.0254             | 8.492          | 0.0083                     |
| <b>Residual</b>       | 0.0629                | 21        | 0.00230            |                |                            |
| <b>Lack of Fit</b>    | 0.0590                | 19        | 0.00310            | 1.574          | 0.459                      |
| <b>Pure Error</b>     | 0.00394               | 2         | 0.00197            |                |                            |
| <b>Total</b>          | 0.873                 | 26        |                    |                |                            |

**Table S6.** ANOVA for the Surface quadratic model of  $q_{\text{total}}$ .

| Source                   | Sum of Squares | df | Mean Square | F Value | p-value Prob > F |
|--------------------------|----------------|----|-------------|---------|------------------|
| <b>Model</b>             | 1.202          | 6  | 0.200       | 10.948  | < 0.0001         |
| <b>pH</b>                | 0.00357        | 1  | 0.00357     | 0.195   | 0.663            |
| <b>[MNZ]</b>             | 0.655          | 1  | 0.655       | 35.782  | < 0.0001         |
| <b>[SMX]</b>             | 0.225          | 1  | 0.225       | 12.279  | 0.0022           |
| <b>pH * [SMX]</b>        | 0.0917         | 1  | 0.0917      | 5.012   | 0.0367           |
| <b>pH<sup>2</sup></b>    | 0.137          | 1  | 0.137       | 7.483   | 0.0127           |
| <b>[SMX]<sup>2</sup></b> | 0.166          | 1  | 0.166       | 9.075   | 0.0069           |
| <b>Residual</b>          | 0.366          | 20 | 0.0183      |         |                  |
| <b>Lack of Fit</b>       | 0.329          | 18 | 0.0183      | 0.997   | 0.613            |
| <b>Pure Error</b>        | 0.0367         | 2  | 0.0183      |         |                  |
| <b>Total</b>             | 1.568          | 26 |             |         |                  |

**Table S7.** Adsorption energies ( $E_{\text{ads}}$ ) of SMX and MNZ n the oxygenated carbonaceous surface.

| Structures                              | $E_{\text{ads}}(\text{kcal mol}^{-1})$ |         |       |
|-----------------------------------------|----------------------------------------|---------|-------|
|                                         | SMX [0]                                | SMX [-] | MNZ   |
| Monocomponent system                    |                                        |         |       |
| Ether - NH                              | -2.59                                  | --      | --    |
| Ether - NH <sub>2</sub>                 | -1.48                                  | --      | --    |
| Ether $\pi$ - $\pi$                     | -0.28                                  | 3.38    | -0.60 |
| Ether - OH                              | --                                     | --      | 3.05  |
| Semiquinone - NH                        | -7.65                                  | --      | --    |
| Semiquinone - NH <sub>2</sub>           | -10.00                                 | --      | --    |
| Semiquinone $\pi$ - $\pi$               | -1.32                                  | -1,20   | -6.01 |
| Semiquinone - OH                        | --                                     | --      | -6.55 |
| Carboxylic-protonated - NH <sub>2</sub> | -0.66                                  | --      | --    |
| Carboxylic-protonated $\pi$ - $\pi$     | -3.19                                  | -3.21   | 0.05  |
| Carboxylic-protonated - OH              | --                                     | --      | -0.37 |
| Carboxylic-protonated – NO              |                                        | -62.86* |       |
| Carboxylic-protonated – SO <sub>2</sub> |                                        | -42.26* |       |
| Phenol-protonated                       | 0.27                                   |         |       |
| Phenol-protonated $\pi$ - $\pi$         |                                        | 0.02    | 0.40  |
| Carboxylic-protonated – NO              |                                        | -44.08* |       |
| Carboxylic-protonated – SO <sub>2</sub> |                                        | -44.05* |       |

\*H<sup>+</sup> transfer to SO<sub>2</sub> group in SMX molecule.
